# Supplementary material for: Caskin2 is a novel talin- and Abi1-binding protein that promotes cell motility
Source: PubMed Central journal article supplement (PMC11166458; doi:10.1242/jcs.262116), 2024-05-16
Supplement: joces-137-262116-s1.pdf [file joces-137-262116-s1.pdf]

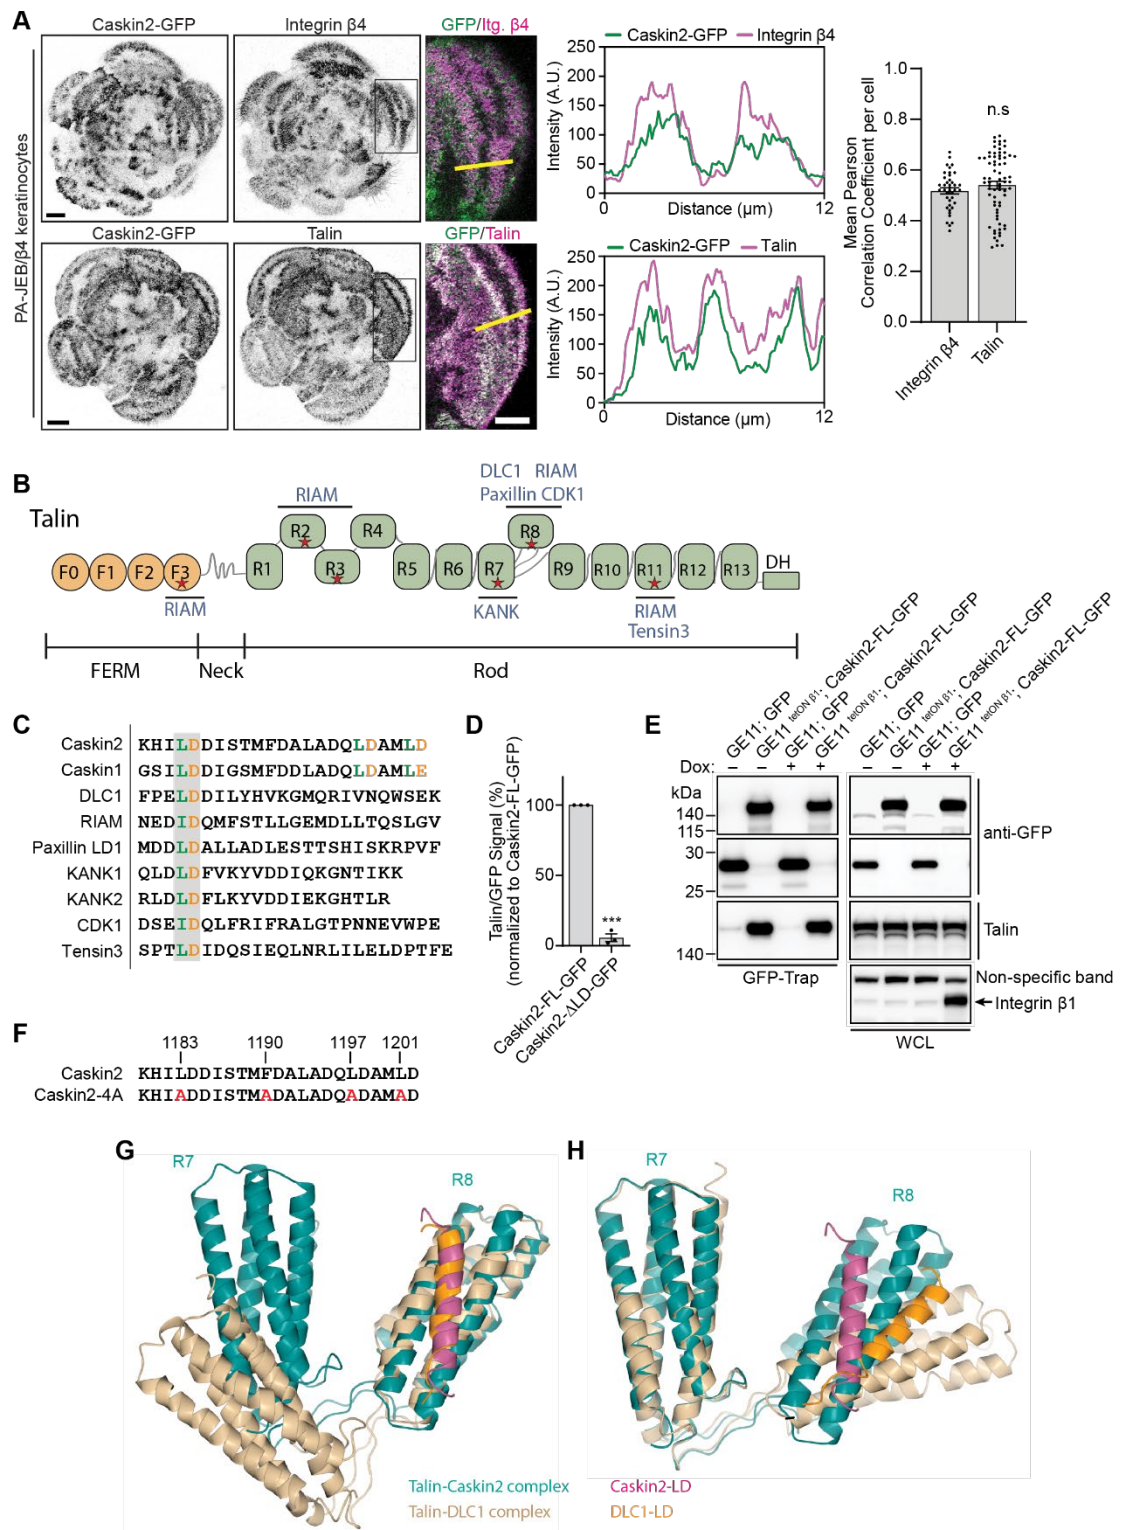

**Fig. S1. Caskin2 co-distributes with talin and localizes in the proximity of HDs, FAs and CMSCs. (A)** Representative immunofluorescence images show Caskin2-GFP (green) together with integrin  $\beta$ 4 or talin (magenta) in PA-JEB/ $\beta$ 4 keratinocytes. Scale bar, 10  $\mu$ m; in inserts represents 5  $\mu$ m. Line profiles shows Caskin2 co-localises with both talin and integrin  $\beta$ 4. Graph

shows the mean Pearson Correlation Coefficient per cell between the Caskin2-GFP signal and either Integrin  $\beta$ 4 or talin; n.s indicates no significant difference; error bars are standard error; unpaired t-test; n = 40 (Integrin  $\beta$ 4) and 71 cells (talins) pooled from 3 independent experiments. **(B)** Talin comprises of a FERM domain with four subdomains (F0-F3, in orange) and a rod domain with 13 bundles (R1-R13, in green), followed by a C-terminal dimerization helix (DH). Some critical interacting proteins are indicated. **(C)** Sequence alignment of the talin-binding motifs of Caskin2, Caskin2, DLC1, RIAM, Paxillin LD1, KANK1, KANK2 and CDK1. Acidic (orange) and hydrophobic (green) residues that mediate the interaction are highlighted. **(D)** Quantification of Talin binding to the indicated GFP-tagged construct, normalized to Caskin2-FL-GFP (corresponding to the graph in Figure 1C). Values were quantified from 3 independent Western blots, error bars are standard error, \*\*\* indicates  $p < 0.0001$  (unpaired t-test). **(E)** GFP-Trap pull-down of GFP expressed in wild-type GE11 ( $\beta$ 1-null) or Caskin2-FL-GFP expressed in GE11<sup>tetON  $\beta$ 1</sup> cells. Cells were cultured continually with or without doxycycline as indicated. Proteins in the GFP-Trap sample and WCL (input) are detected by Western blotting, using antibodies against GFP, talin, and integrin  $\beta$ 1. Note that doxycycline induces integrin  $\beta$ 1 expression only in the GE11<sup>tetON  $\beta$ 1</sup> cells. Talin binding to Caskin2-FL-GFP is not affected by the presence of integrin  $\beta$ 1. A representative Western blot is shown (n=3). **(F)** Amino acid sequences of the Caskin2 LD-motif and the 4A mutant containing 4 alanine mutations. **(G and H)** Comparison of the crystal structure of talin R7R8 in complex with Caskin2-LD (magenta) and in complex with DLC1-LD (residues 467-489; orange), which is aligned on the R8 domain **(G)** and R7 domain **(H)**.

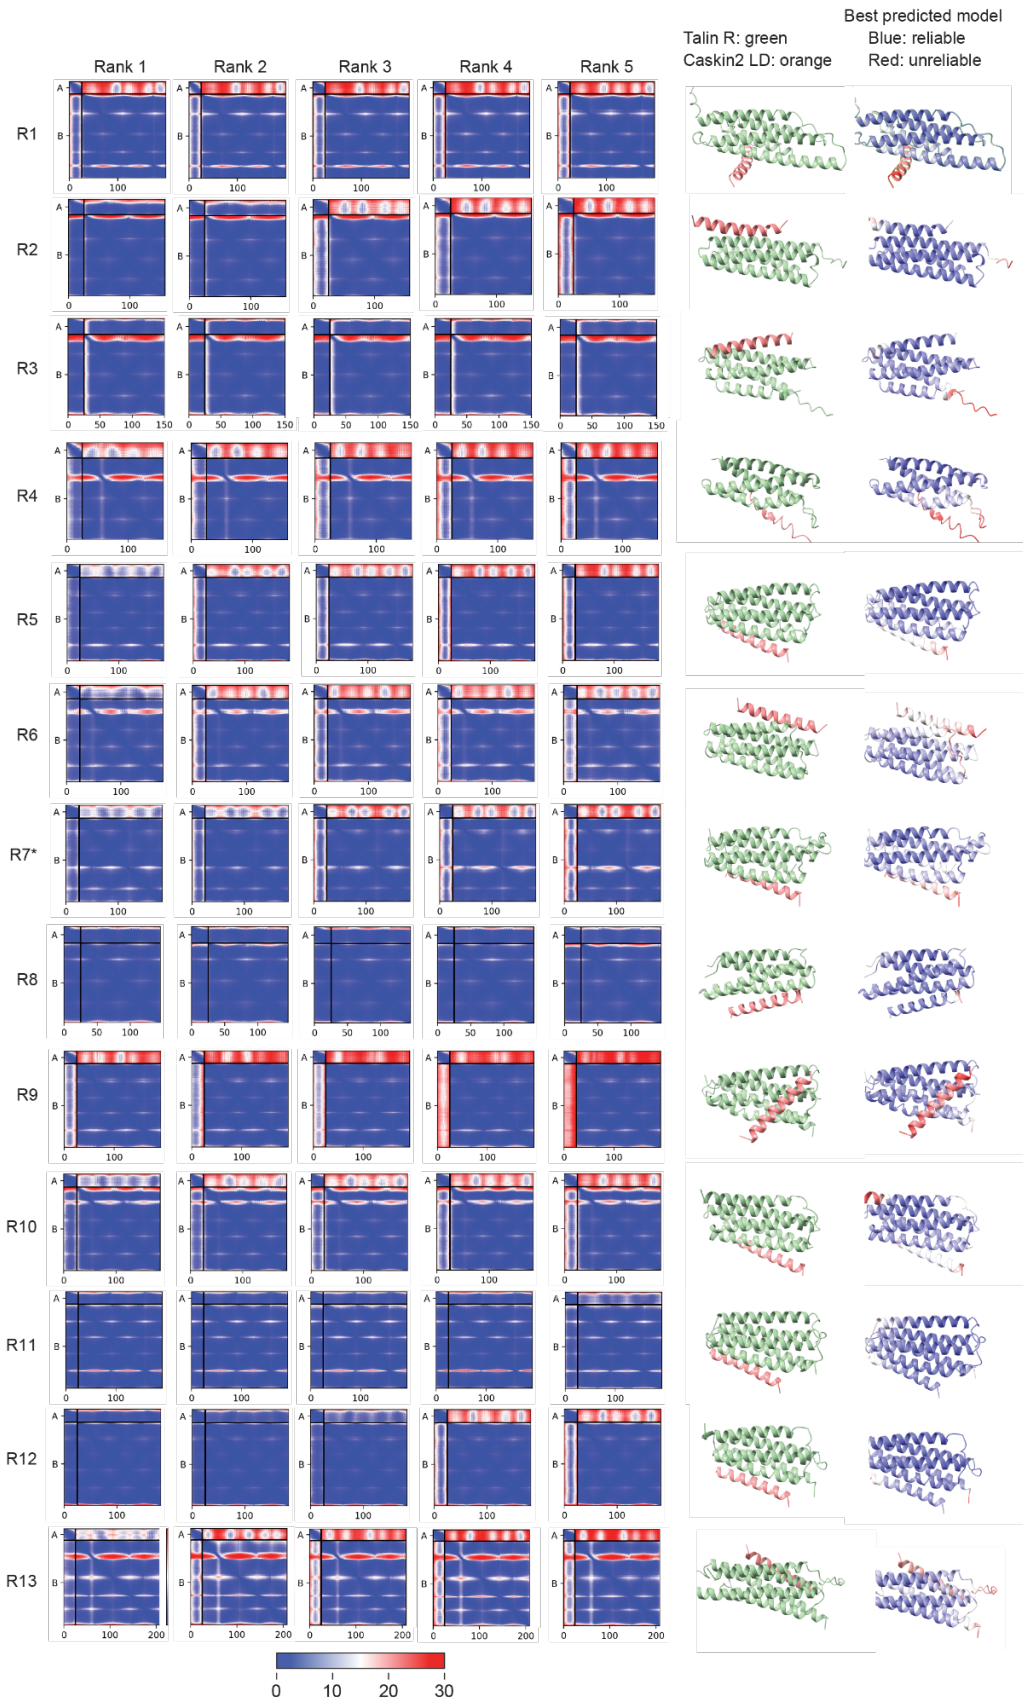

**Fig. S2. AlphaFold modelling for Caskin2-LD interactions with different talin rod domains.** The different columns show: the talin rod domain examined in each row; the Predicted Alignment Error (PAE) plots for the five top-ranked models (blue: high confidence interaction; red: low confidence interaction); a cartoon model of the complex with talin rod domain in green and the Caskin2 LD peptide in orange; the same model coloured by local confidence.

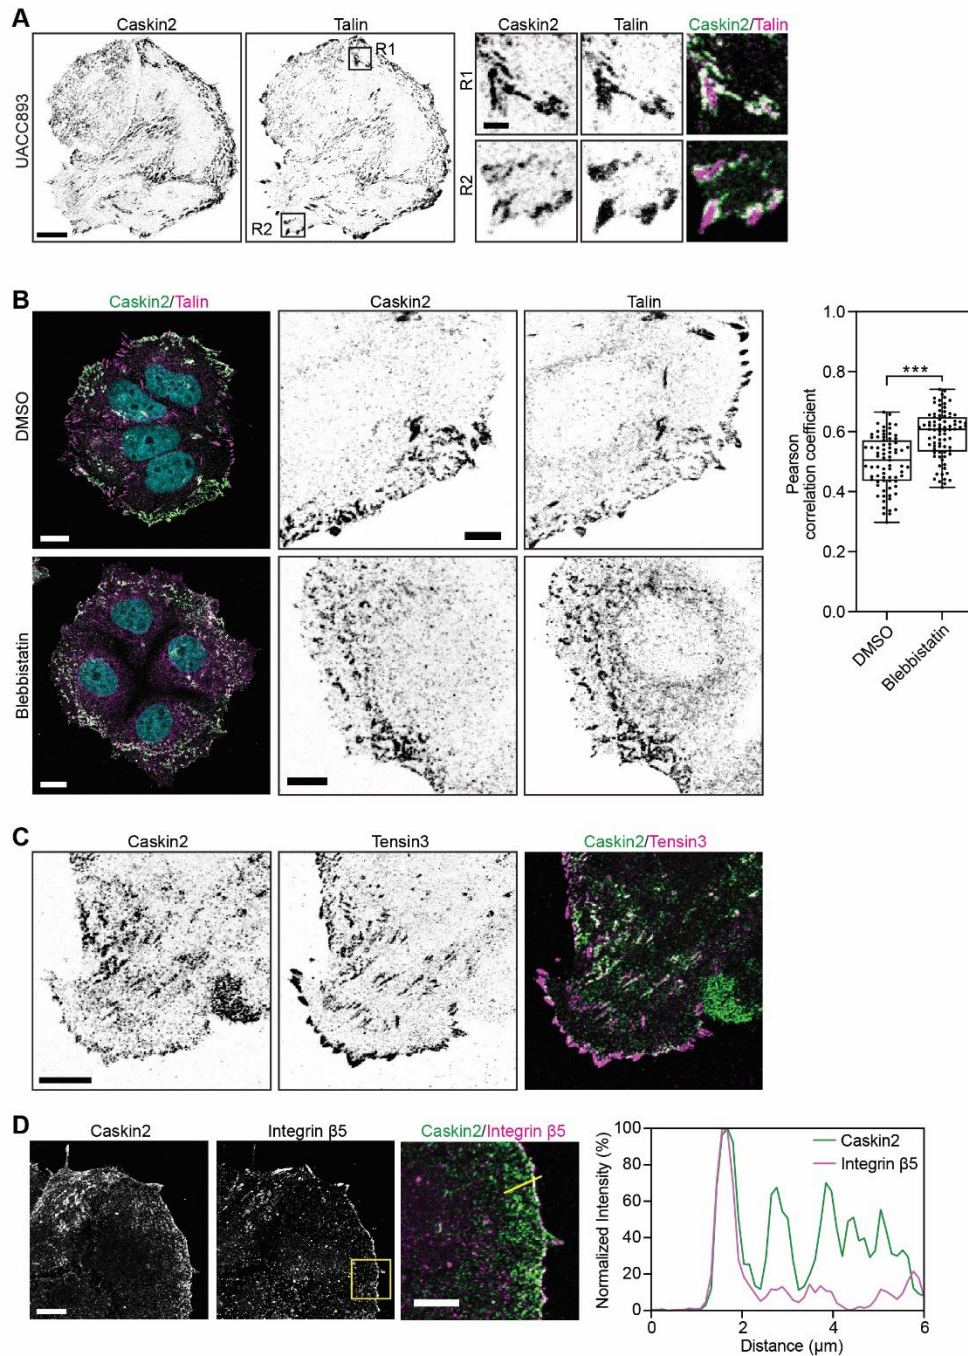

**Fig. S3.** Representative IF images show endogenous Caskin2 (green in merge) and talin (magenta in merge), in UACC893 cells. Scale bar, 10  $\mu\text{m}$ ; in inserts represents 2  $\mu\text{m}$ . **(B)** Representative IF images show Caskin2 (green), talin (magenta), and DAPI (cyan) in MCF7 cells treated with DMSO or 20  $\mu\text{M}$  blebbistatin for 45 min. Scale bar, 10  $\mu\text{m}$ ; in magnified region, 5  $\mu\text{m}$ . Pearson's correlation analysis for the extent of co-localization of Caskin2 with talin in DMSO (n = 75) or Blebbistatin (n = 81) treated MCF7 cells. Data are presented as box-and-whisker plots, in which the box extends the 25<sup>th</sup> to 75<sup>th</sup>

percentiles, the middle line indicates the median, and whiskers go down to the smallest value and up to the largest. \*\*\*\*,  $P < 0.0001$ , t-test. **(C)** Representative IF images showing endogenous Caskin2 (green) together with Tensin3 (magenta) in MCF7 cells. Scale bar, 10  $\mu\text{m}$ . **(D)** Representative IF images showing endogenous Caskin2 (green in merge) and integrin  $\beta 5$  (magenta in merge) in MCF7 cells. Yellow arrow shows integrin  $\beta 5$  in flat clathrin lattices, which do not contain Caskin2. Scale bar indicates 10  $\mu\text{m}$ .

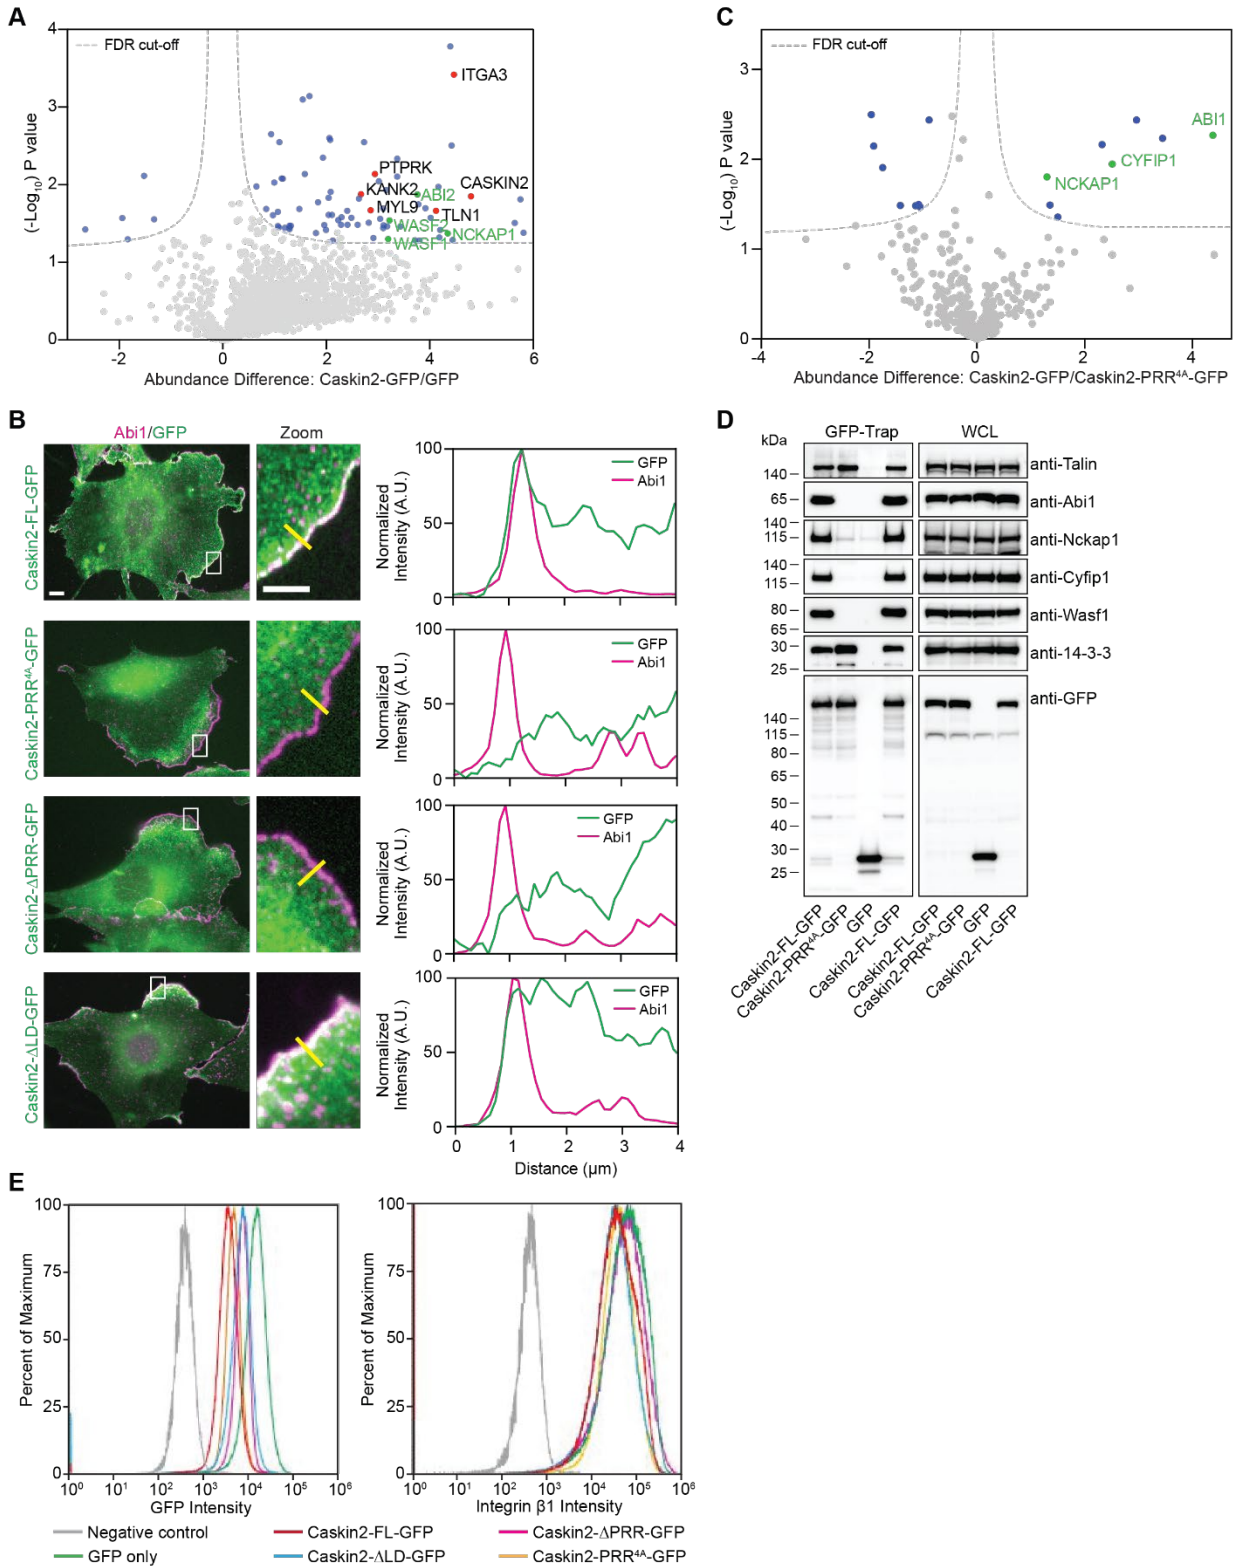

**Fig. S4. Caskin2 associates with components of the WAVE Regulatory Complex.** (A) GFP-Trap pull-down of GFP (control) and GFP-tagged Caskin2 stably expressed in HaCaT cells. Pulled down proteins were identified by mass spectrometry. The volcano plot shows the results from three independent experiments (FDR: 0.05 and S0: 0.1). Significant interactors of Caskin2 and GFP

are indicated in blue (GFP interactors on the left side and Caskin2 interactors on the right side) and red, with WAVE components indicated in green. **(B)** Representative immunofluorescence images of GE11<sup>tetON</sup>  $\beta$ 1 cells expressing Caskin2-FL-GFP, Caskin2-PRR<sup>4A</sup>-GFP, Caskin2- $\Delta$ PRR-GFP, or Caskin2- $\Delta$ LD-GFP together with endogenous Abi1. Line profiles show Caskin2-FL-GFP co-localises with Abi1 at the cell periphery, which is not seen in the two constructs deficient for Abi1 binding. Deletion of the talin-binding LD motif does not affect Abi1 co-localization. Scale bars indicate 10  $\mu$ m; in magnified regions indicate 5  $\mu$ m. **(C)** GFP-Trap pull-down of Caskin2-FL-GFP and Caskin2-PRR<sup>4A</sup>-GFP co-expressed with HA-Abi1 in COS-7 cells. Pulled down proteins were identified by mass spectrometry. The volcano plot shows the results from three independent experiments (FDR: 0.05 and S0: 0.1). Significant interactors of Caskin2-FL-GFP but not Caskin2-PRR<sup>4A</sup>-GFP are on the right side indicated in blue; WAVE components are indicated in green. **(D)** GFP-Trap pull-down of GFP (control), Caskin2-FL-GFP or Caskin2-PRR<sup>4A</sup>-GFP stably expressed in GE11<sup>tetON</sup>  $\beta$ 1 cells. Precipitated proteins were analyzed by Western blotting, probed with antibodies against GFP, Talin, Abi1, Nckap1, Cyfip2, Wasf1 and 14-3-3. **(E)** Flow cytometry analysis of GFP and integrin  $\beta$ 1 expression in GE11<sup>tetON</sup>  $\beta$ 1 cells stably expressing the indicated construct.

### **Table S1. Caskin2 BiOLD in PA-JEB/ $\beta$ 4 keratinocytes.**

Available for download at

<https://journals.biologists.com/jcs/article-lookup/doi/10.1242/jcs.262116#supplementary-data>

**Table S2. Data collection and refinement statistics for protein structure analysis.**

| <b>Data Collection</b>                                                       |                                     |
|------------------------------------------------------------------------------|-------------------------------------|
| Wavelength (Å)                                                               | 1.00                                |
| Resolution (Å)                                                               | 49.09–2.72 (2.85–2.72) <sup>a</sup> |
| Space Group                                                                  | P 2 <sub>1</sub> 2 <sub>1</sub>     |
| Unit Cell a, b , c (Å)                                                       | 46.66, 61.35, 98.18                 |
| CC <sub>1/2</sub>                                                            | 0.998 (0.605) <sup>a</sup>          |
| R <sub>merge</sub>                                                           | 0.162 (2.479) <sup>a</sup>          |
| <I/σ(I)>                                                                     | 9.5 (1.3) <sup>a</sup>              |
| Completeness (%)                                                             | 99.8 (99.0) <sup>a</sup>            |
| Multiplicity                                                                 | 12.9 (13.6) <sup>a</sup>            |
| <b>Refinement</b>                                                            |                                     |
| Reflections work/test (nr)                                                   | 7581/424                            |
| Atoms Talin/Caskin-2 (nr)                                                    | 2189/193                            |
| B-factors Talin/Caskin-2 (Å <sup>2</sup> )                                   | 87/77                               |
| R <sub>work</sub> /R <sub>free</sub> /R <sub>complete</sub> <sup>b</sup> (%) | 24.2/26.9/27.9                      |
| rmsZ bond lengths/bond angles <sup>b</sup>                                   | 0.349/0.530                         |
| Model validation                                                             |                                     |
| Ramachandran preferred/outliers <sup>c</sup> (%)                             | 99.1/0.0                            |
| Ramachandran Z-score <sup>d</sup>                                            | -1.37 ± 0.50                        |
| Rotamers preferred/outliers (%) <sup>c</sup>                                 | 99.2/0.4                            |
| Rotamer Z-score <sup>d</sup>                                                 | -1.59 ± 0.57                        |
| Clashscore (%-ile) <sup>c</sup>                                              | 100                                 |
| MolProbity score (%-ile) <sup>c</sup>                                        | 100                                 |

**Table S3. GE11 and HaCaT GFP-Trap mass spectrometry.**

Available for download at

<https://journals.biologists.com/jcs/article-lookup/doi/10.1242/jcs.262116#supplementary-data>



### Table S4. COS-7 GFP-Trap mass spectrometry.

Available for download at

<https://journals.biologists.com/jcs/article-lookup/doi/10.1242/jcs.262116#supplementary-data>

### Table S5. Primary antibody list

| Antibody                         | Clone/Cat#             | Obtained from                   | Host       | Application             |
|----------------------------------|------------------------|---------------------------------|------------|-------------------------|
| Integrin $\beta$ 1               | 12G10                  | Prof. M. Humphries <sup>1</sup> | Mouse mAb  | FACS: 1:200             |
| Integrin $\beta$ 4               | 450-11A/555722         | BD Bioscience                   | Mouse mAb  | IF: 1:100               |
| Integrin $\beta$ 5               | 5HK2                   | Homemade <sup>2</sup>           | Rabbit pAb | WB: 1:1000              |
| Caskin2                          | HPA075184              | Sigma-Aldrich                   | Rabbit pAb | IF: 1:100<br>WB: 1:1000 |
| Caskin2                          | D9/sc-377512           | Santa Cruz Biotechnology        | Mouse mAb  | IF: 1:100<br>WB: 1:1000 |
| Talin                            | 8D4/157808             | Abcam                           | Mouse mAb  | IF:1:200<br>WB: 1:1000  |
| Vinculin                         | VIIF9<br>(supernatant) | Dr. M. Glukhova <sup>3</sup>    | Mouse mAb  | IF: 1:5                 |
| Paxillin                         | Clone 349/P13520       | BD transduction Lab.            | Mouse mAb  | IF: 1:100               |
| Tensin3                          | PA5-63112              | ThermoFischer Scientific        | Rabbit pAb | IF: 1:100               |
| KANK2                            | HPA015643              | Sigma-Aldrich                   | Rabbit pAb | IF: 1:100               |
| Liprin $\alpha$ 1                | 14175-1-AP             | Proteintech                     | Rabbit pAb | IF: 1:200               |
| Abi1                             | HPA068407              | Sigma, Atlas antibodies         | Rabbit pAb | WB: 1:1000<br>IF: 1:100 |
| WAVE                             | F10/sc-365165          | Santa Cruz Biotechnolgy         | Rabbit pAb | WB: 1:1000              |
| NCKAP1                           | PA5-88433              | InVitrogen                      | Rabbit pAb | WB: 1:1000              |
| CYFIP1                           | PA5-87780              | InVitrogen                      | Rabbit pAb | WB: 1:1000              |
| 14-3-3                           |                        | Homemade <sup>4</sup>           | Rabbit pAb | WB: 1:1000              |
| pEGFR (Y845)                     | #2231                  | Cell Signaling Technology       | Rabbit pAb | WB: 1:1000              |
| pAkt (S473)                      | #9271S                 | Cell Signaling Technology       | Rabbit pAb | WB: 1:1000              |
| pERK1/2 (p44/p42)<br>(T202/Y204) | #9101                  | Cell Signaling Technology       | Rabbit pAb | WB: 1:1000              |
| GAPDH                            | D16H11/#5174           | Cell Signaling Technology       | Rabbit mAb | WB: 1:1000              |
| GFP                              |                        | Homemade <sup>5</sup>           | Rabbit pAb | WB: 1:1000              |
| HA                               | 12CA5                  | ThermoFischer Scientific        | Mouse mAb  | WB: 1:1000              |

1. Prof. M. Humphries, University of Manchester, Manchester, UK
2. Zuidema, A., Wang, W., Kreft, M., te Molder, L., Hoekman, L., Bleijerveld, O.B., Nahidiazar, L., Janssen, H., and Sonnenberg, A. (2018). Mechanisms of integrin  $\alpha$ V $\beta$ 5 clustering in flat clathrin lattices. *J. Cell Sci.* 131(21):jcs221317. doi: 10.1242/jcs.221317.
3. Dr. M. Glukhova, Institute Curie, Paris, France
4. Van der Hoeven, P.C.J., van der Wal, J.C.M., Ruurs, P., van Dijk, M.C.M., and van Blitterswijk, W.J. (2000). 14-3-3 Isotypes facilitate coupling of protein kinase C- $\zeta$  to Raf-1 : negative regulation by 14-3-3 phosphorylation. *Biochem. J.* 345, 297–306.
5. Rocha, N., Kuijl, C., van der Kaant, R., Janssen, L., Houben, D., Janssen, H., Zwart, W., and Neefjes, J. (2009). Cholesterol sensor ORP1L contacts the ER protein VAP to control Rab7–RILP–p150<sup>Glued</sup> and late endosome positioning. *J. Cell Biol.* 185, 1209–1225.
